# Supplementary material for: In-depth Mendelian randomization analysis of causal factors for coronary artery disease
Source: PubMed Central journal article supplement (PMC7280530; doi:10.1038/s41598-020-66027-4), 2020-06-08
Supplement: 41598_2020_66027_MOESM1_ESM.pdf [file 41598_2020_66027_MOESM1_ESM.pdf]

# In-depth Mendelian randomization analysis of causal factors for coronary artery disease

Yuan-De Tan, Peng Xiao and Chittibabu Guda\*

## Supplementary Notes:

### **Note S1: $P_{cj}$ , $P_{dj}$ , $P_{vj}$ definitions**

To correctly select SNPs from GWAS data or meta-GWAS data, we here defined  $P_c$  and  $P_d$  as proportion cutoffs in sample sizes of causal variables and of a disease of study, respectively, and defined  $P_v$  as p-value cutoff in the causal data. We also defined

$$\begin{aligned} P_{cj} &= \sum_{i=1}^n s_{ij} / \max_{j=1}^m (\sum_{i=1}^n s_{ij}) \quad , \\ P_{dj} &= s_{dj} / \max_{j=1}^m (s_{dj}) \quad , \\ P_{vj} &= \min_{j=1}^m (p_{ij}) \end{aligned}$$

where  $n$  is number of casual variables,  $m$ , number of SNPs in GWAS data,  $s_{ij}$ , sample size for  $SNP_j$  in causal variable  $i$ ,  $s_{dj}$ , sample size for  $SNP_j$  in the disease data and  $p_{ij}$ , p-value for t-testing for association of  $SNP_j$  with casual variable  $i$  in regression analysis.

### **Note S2: An algorithm for selecting SNPs with reducing linkage disequilibrium**

Since most of GWAS data do not give linkage disequilibrium (LD) values between SNPs, we use the following algorithm to remove SNPs with strong LD. Suppose we have a GWAS dataset with  $G$  SNPs each having chromosome position (bp), major allele frequency, beta values, p-values, sample sizes( $N$ ) of LDL, HDL, TG, and CAD in GWAS analysis. To choose a SNP as a valid instrument variable, we first calculate  $P_{vj}$ ,  $P_{cj}$  and  $P_{dj}$ . The algorithm for choosing SNPs without strong LD is given as

Step 1: All SNPs meeting  $P_{vj} < P_v$  are chosen from the GWAS data and sub-dataset A is generated with these SNPs from the GWAS data.

Step 2: All SNPs meeting  $P_{cj} > P_c$  are chosen from the sub-dataset A and sub-dataset B is generated with these chosen SNPs from sub-dataset A.

Step 3: All SNPs meeting  $P_{dj} > P_d$  are chosen from sub-dataset B and sub-dataset C is generated with these chosen SNPs from sub-dataset B.

Step 4: Order SNPs by chromosomes.

Step 5: Choose chromosome 1 and order SNPs by positions in hg19 from the smallest position to the largest one.

Step 6: Set  $DI = (\text{largest position} - \text{smallest position}) / AIL$  where DI is distance index and AIL is adjacent interval length.

Step 7: If  $DI \leq 1$ , then only one SNP at the smallest or largest position in this chromosome is chosen, otherwise, if distance between positions  $j+1$  and  $j > AIL$  and distance between positions  $j+2$  and  $j+1 > AIL$ , SNPs at positions  $j$  and  $j+1$  are chosen where  $j = 1, \dots, N_i$  where  $N$  is the largest position on chromosome  $i$ .

Step 8: Repeat step 7 from  $j = \text{position}_1$  to the third largest position.

Step 9: Repeat step 5 through step 8 until chromosome 22.

Step 10: Use these SNP chosen to create sub-dataset D from sub-dataset C.

**Note S3: Mathematic models for balance between LDL-c and HDL-c to determine causal effect of TG on CAD**

From the results which TG was not associated with the risk for CAD by using the 83 shared SNPs in the SNP338 dataset as instrumental variables (**Fig. 6a**), we can infer

that the 64 SNPs shared with HDL-c and TG (**Fig. 3d**) were associated with HDL-c but their genes mostly had strong negative pleiotropic effects on TG and although 35 shared SNPs with LDL-c and TG were associated with LDL-c, their genes mostly had strong positive pleiotropic effect on TG. In MVMR analysis, after adjusting for HDL-c and LDL-c, if pleiotropic effects of SNPs associated with HDL-c and with LDL-c were balanced, TG is not associated with CAD. These results can be explained by the following multivariate regression model:

$$\sum_{j=1}^m \beta_{CADj} = a + \beta_{TG} \sum_{j=1}^m \beta_{TGj} + \beta_{LDL} \sum_{j=1}^m \beta_{LDLj} + \beta_{HDL} \sum_{j=1}^m \beta_{HDLj} + \beta_e \sum_{j=1}^m e_j$$

where  $a$  is intersection;  $j$ ,  $SNP_j$ ;  $\beta_{xj}$ , a regression coefficient of  $SNP_j$  on a factor  $x$  ( $x =$  TG, HDL-c, LDL-c, or CAD);  $\beta_x$ , regression coefficient of risk factor  $x$  on CAD; and  $e_j$ , random effect. When  $m$  (number of SNPs selected) is larger,  $\sum_j^m e_j \approx 0$ . In testing for association of TG with risk for CAD using the shared SNPs as instrumental variables, if TG and HDL-c share  $SNP_j$ , both  $|\beta_{TGj}|$  and  $|\beta_{HDLj}|$  are larger, or if TG and LDL-c share  $SNP_j$ , both  $|\beta_{TGj}|$  and  $|\beta_{LDLj}|$  are larger. For the convenience, we replace  $\beta_{TGj}$  with  $\beta_{TGj_h}$  if  $SNP_j$  is shared with HDL-c and TG or with  $\beta_{TGj_l}$  if  $SNP_j$  is shared with LDL-c and TG, the regression above can be changed as

$$\sum_j^m \beta_{CADj} = a + \beta_{TG} (\sum_{j_h}^{m_h} \beta_{TGj_h} + \sum_{j_l}^{m_l} \beta_{TGj_l}) + \beta_{LDL} \sum_j^m \beta_{LDLj} + \beta_{HDL} \sum_j^m \beta_{HDLj} + \beta_e \sum_j^m e_j$$

where  $m_h + m_l = m$ . In balance of pleiotropic effects between HDL-c and LDL-c,  $\sum_{j_h}^{m_h} \beta_{TGj_h} + \sum_{j_l}^{m_l} \beta_{TGj_l} = 0$  and then  $\beta_{TG} = 0$ . This is case in the 83 shared SNPs in the SNP338 dataset (**Fig. 6a**). In the case of unbalance, if  $\sum_{j_h}^{m_h} \beta_{TGj_h} + \sum_{j_l}^{m_l} \beta_{TGj_l} > 0$  and  $\sum_j^m \beta_{CADj} > 0$ , or  $\sum_{j_h}^{m_h} \beta_{TGj_h} + \sum_{j_l}^{m_l} \beta_{TGj_l} < 0$  and  $\sum_j^m \beta_{CADj} < 0$ , then  $\beta_{TG} > 0$  in statistics due to positive pleiotropic effect of SNPs associated with LDL-c, examples can

be found in the 99 (**Fig. 6c**) and 45 shared SNPs (**Fig. 6c**) in the SNP185 dataset or if  $\sum_{j_h}^{m_h} \beta_{TGj_h} + \sum_{j_l}^{m_l} \beta_{TGj_l} < 0$  but  $\sum_j^m \beta_{CADj} > 0$  or  $\sum_{j_h}^{m_h} \beta_{TGj_h} + \sum_{j_l}^{m_l} \beta_{TGj_l} > 0$  but  $\sum_j^m \beta_{CADj} < 0$ , then  $\beta_{TG} < 0$  in statistics due to negative pleiotropic effects of SNPs associated with HDL-c, like in the 116 shared SNPs in the SNP363 data (**Fig. 6b**).

Simulation breaks LD between SNPs  $j$  and  $k$  (no link between  $(\beta_{xj}, \beta_{CADj})$  and  $(\beta_{xk}, \beta_{CADk})$ ) and removes pleiotropy of SNPs between lipids  $x$  and  $y$  (no association between  $(\beta_{xj}, \beta_{CADj})$  and  $(\beta_{yj}, \beta_{CADj})$ ). Simulation tests for associations of LDL-c and HDL-c with risk for CAD in the SNP338 and SNP363 datasets in no noise and noise cases directly verified the conclusion above. For TG, the test SNPs consist of two groups: one group in which SNPs were associated with HDL-c and TG in the test data is similar to, as noted in the second regression model,  $\beta_{TGj}$  is referred to as  $\beta_{TGj_h}$  for SNP $_j$ , and the other group in which SNPs were associated with LDL-c and TG in the test data, the  $\beta_{TGj}$  is referred to as  $\beta_{TGj_l}$ . If  $\sum_{j=1}^{m_h} \beta_{TGj_h}$  and  $\sum_{j=1}^{m_l} \beta_{TGj_l}$  are balanced to be zero, then  $\beta_{TG} = 0$ . The case can be seen in simulations using SNP338 and SNP363 datasets as test datasets. For the SNP185 dataset of Do et al<sup>3</sup>, many SNPs associated with HDL-c were not selected due to selection bias so that HDL-c was not associated with risk for CAD. On the other hand, as shown in Figure 3g, TG had 24 SNPs associated with HDL-c only but just 8 SNPs associated with LDL-c only. Table 2 also shows that in SNP185 dataset, TG was negatively correlated with HDL-c ( $r = -0.30512, p < 0.0001$ ) but not correlated with LDL-c ( $r = 0.034, p = 0.64$ ). Therefore, in simulated data,  $|\sum_{j=1}^{m_h} \beta_{TGj_h}| > |\sum_{j=1}^{m_l} \beta_{TGj_l}|$ , leading to  $\beta_{TG} < 0$  in statistics.

## Supplementary Tables:

Table S1. Data sources and information

| Data name                                    | Risk factors or disease   | Number of participates            | SNP Number | Data sources or references                                                                                                          |
|----------------------------------------------|---------------------------|-----------------------------------|------------|-------------------------------------------------------------------------------------------------------------------------------------|
| metabochip data (Mc)                         | LDL-c, HDL-c, TG          | 188577                            | 120165     | <a href="http://csg.sph.umich.edu/abecasis/public/lipids2013/">http://csg.sph.umich.edu/abecasis/public/lipids2013/</a>             |
| Joint GWAS and metabochip data (jointGwasMc) | LDL-c, HDL-c, TG          | 187167                            | 2436375    | <a href="http://csg.sph.umich.edu/abecasis/public/lipids2013/">http://csg.sph.umich.edu/abecasis/public/lipids2013/</a>             |
| CARDIoGRAMplusC4D                            | CAD                       | Cases: 63746<br>Controls: 130 681 | 2420360    | <a href="http://www.cardiogramplusc4d.org/downloads/">http://www.cardiogramplusc4d.org/downloads/</a>                               |
| Data of 185 SNPs of Do et al.(2013)          | LDL-c, HDL-c, TG, and CAD | 188577                            | 185        | <a href="http://www.nature.com/ng/journal/v45/n11/full/ng.2795.html">http://www.nature.com/ng/journal/v45/n11/full/ng.2795.html</a> |

CAD, coronary artery disease; CARDIoGRAMplusC4D: Coronary Artery Disease Genome-wide Replication and Meta-analysis plus Coronary Artery Disease Genetics; GLGC, Global Lipids Genetic Consortium; HDL-c, high-density lipoprotein cholesterol; LDL-C; low-density lipoprotein cholesterol; TG: triglycerides; SNP: single nucleotide polymorphism.

Table S2. Selection schemes of SNPs

| Scheme A |       |       |       |      | Scheme B |       |       |       |      |
|----------|-------|-------|-------|------|----------|-------|-------|-------|------|
| AIL      | $P_v$ | $P_c$ | $P_d$ | SNP# | AIL      | $P_v$ | $P_c$ | $P_d$ | SNP# |
| 25000    | 5e-08 | 0.99  | 0.99  | 58   | 25000    | 5e-08 | 0.979 | 0.979 | 58   |
| 20000    | 5e-08 | 0.99  | 0.99  | 73   | 20000    | 5e-08 | 0.979 | 0.979 | 68   |
| 15000    | 5e-08 | 0.99  | 0.99  | 80   | 15000    | 5e-08 | 0.979 | 0.979 | 91   |
| 10000    | 5e-08 | 0.99  | 0.99  | 94   | 10000    | 5e-08 | 0.979 | 0.979 | 121  |
| 5000     | 5e-08 | 0.99  | 0.99  | 114  | 5000     | 5e-08 | 0.979 | 0.979 | 178  |
| 1000     | 5e-08 | 0.99  | 0.99  | 133  | 1000     | 5e-08 | 0.979 | 0.979 | 266  |
|          | 5e-08 | 0.99  | 0.99  | 171  |          | 5e-08 | 0.979 | 0.979 | 338  |
|          | 5e-08 | 0.98  | 0.98  | 265  |          | 5e-08 | 0.95  | 0.972 | 735  |
|          | 5e-08 | 0.979 | 0.979 | 338  |          |       |       |       |      |
|          | 5e-08 | 0.972 | 0.972 | 582  |          |       |       |       |      |
|          | 5e-08 | 0.95  | 0.972 | 735  |          |       |       |       |      |

$P_v$  is a given threshold for minimum p-value ( $P_{vj}$ ) of SNPs associated with LDL-c, HDL-c and TG;  $P_c$ , a given threshold for proportion ( $P_{cj}$ ) of sum of sample size of SNP j over all causal variables to the max sum of sample sizes over all SNPs in data;  $P_d$ , a given threshold for proportion ( $P_{dj}$ ) of sample size of SNP j in disease to the max sample sizes over all SNPs (See **Supplementary Note S2**).

Table S3. Correlation analysis between LDL-c, HDL-c and TG

| from data                  | SNP # |       | LDL-c    | HDL-c    | TG      |
|----------------------------|-------|-------|----------|----------|---------|
| Mc-lipid-CAD               | 338   | LDL-c | 1        | 0.2114   | <0.0001 |
|                            |       | HDL-c | -0.06668 | 1        | <0.0001 |
|                            |       | TG    | 0.420036 | -0.55972 | 1       |
| jointGwasMc-lipid-CAD      | 363   | LDL-c | 1        | 0.090419 | <0.0001 |
|                            |       | HDL-c | -0.08952 | 1        | <0.0001 |
|                            |       | TG    | 0.330894 | -0.6977  | 1       |
| data of white et al (2016) | 145   | LDL-c | 1        | 0.0719   | 0.5900  |
|                            |       | HDL-c | -0.14991 | 1        | <0.0001 |
|                            |       | TG    | -0.04512 | -0.45708 | 1       |
| data of Do et al (2013)    | 185   | LDL-c | 1        | 0.0526   | 0.6464  |
|                            |       | HDL-c | -0.14312 | 1        | <0.0001 |
|                            |       | TG    | 0.034039 | -0.30512 | 1       |

Note: correlation coefficients are under diagonal lines and corresponding p-values are above diagonal lines.

Table S4. Results of MR-PRESSO analysis of dataset SNP338

| Exposure | MR Analysis       | Causal Estimate | Sd         | T-stat     | P-value      |
|----------|-------------------|-----------------|------------|------------|--------------|
| ldl      | Raw               | 0.3559716       | 0.03506907 | 10.150586  | 2.764653e-21 |
| hdl      | Raw               | -0.3449137      | 0.03446413 | -10.007903 | 8.423297e-21 |
| tg       | Raw               | 0.1604794       | 0.03392713 | 4.730118   | 3.312579e-06 |
| ldl      | Outlier-corrected | NA              | NA         | NA         | NA           |
| hdl      | Outlier-corrected | NA              | NA         | NA         | NA           |
| tg       | Outlier-corrected | NA              | NA         | NA         | NA           |

MR-PRESSO results`Global Test`RSSobs: 550.0842

MR-PRESSO results`Global Test`Pvalue: <0.001

MR-PRESSO results`Distortion Test`Outliers Indice: No significant outliers

MR-PRESSO results`Distortion Test`Distortion Coefficient: NA

MR-PRESSO results`Distortion Test`Pvalue: NA

Table S5. Results of MR-PRESSO analyses of datasets SNP363 and SNP360

| data                                         | Exposure | MR Analysis       | Causal Estimate | Sd      | T-stat    | P-value      |
|----------------------------------------------|----------|-------------------|-----------------|---------|-----------|--------------|
| SNP338                                       | ldl      | Raw               | 0.42386         | 0.04038 | 10.496331 | 1.155620e-22 |
|                                              | hdl      | Raw               | -0.38128        | 0.05090 | -7.490704 | 5.346223e-13 |
|                                              | tg       | Raw               | 0.15585         | 0.05816 | 2.679619  | 7.709089e-03 |
|                                              | ldl      | Outlier-corrected | 0.51658         | 0.04571 | 11.301323 | 1.464482e-25 |
|                                              | hdl      | Outlier-corrected | 0.51658         | 0.04571 | 11.301323 | 1.464482e-25 |
|                                              | tg       | Outlier-corrected | 0.51658         | 0.04571 | 11.301323 | 1.464482e-25 |
| SNP360<br>(3 SNPs were excluded from SNP338) | ldl      | Raw               | 0.44025         | 0.03904 | 11.275608 | 1.978695e-25 |
|                                              | hdl      | Raw               | -0.37571        | 0.04913 | -7.647783 | 1.916145e-13 |
|                                              | tg       | Raw               | 0.15102         | 0.05609 | 2.692141  | 7.433924e-03 |
|                                              | ldl      | Outlier-corrected | NA              | NA      | NA        | NA           |
|                                              | hdl      | Outlier-corrected | NA              | NA      | NA        | NA           |
|                                              | tg       | Outlier-corrected | NA              | NA      | NA        | NA           |

MR-PRESSO results`Global Test`RSSobs: 672.9603

MR-PRESSO results`Global Test`Pvalue: <0.001

MR-PRESSO results`Distortion Test`Outliers Indice: No significant outliers

MR-PRESSO results`Distortion Test`Distortion Coefficient: NA

MR-PRESSO results`Distortion Test`Pvalue: NA

Table S6. R<sup>2</sup> of SNP datasets

|                  |               | LDL-c    | HDL-c    | TG       |
|------------------|---------------|----------|----------|----------|
| <b>SNP338</b>    | <b>total</b>  | 0.067658 | 0.020118 | 0.010047 |
|                  | <b>shared</b> | 0.118296 | 0.372035 | 0.135062 |
|                  | <b>unique</b> | 0.158198 | 0.071825 | 0.170607 |
| <b>SNP363</b>    | <b>total</b>  | 0.058397 | 0.004520 | 0.030580 |
|                  | <b>shared</b> | 0.036203 | 0.116992 | 0.082518 |
|                  | <b>unique</b> | 0.114813 | 0.047842 | 0.080932 |
| <b>SNP173(1)</b> |               | 0.069171 | 0.021500 | 0.037258 |
| <b>SNP173(2)</b> |               | 0.065374 | 0.018952 | 0.033582 |
| <b>SNP185</b>    |               | 0.015385 | 0.162740 | 0.028591 |
| <b>SNP145</b>    |               | 0.038207 | 0.328188 | 0.038345 |

Table S7. Results <sup>a</sup> of simulation MVMR analysis of lipid risk for coronary artery disease using SNP338 data as test data and Mc-lipid-CAD data as mother data

| Pc                                                 | Pd   | SNP number found |       |       |     | LDL-c |       | HLD-c    |        | TG       |         |         |
|----------------------------------------------------|------|------------------|-------|-------|-----|-------|-------|----------|--------|----------|---------|---------|
|                                                    |      | Total            | LDL-c | HDL-c | TG  | FDR   | beta  | p-value  | beta   | p-value  | beta    | p-value |
| <b>null p-value is distributed from 1e-07 to 1</b> |      |                  |       |       |     |       |       |          |        |          |         |         |
| 0.9                                                | 0.9  | 394              | 101   | 148   | 148 | 0.0   | 0.430 | 3.83E-14 | -0.392 | 2.40E-16 | -0.034  | 0.35993 |
| 0.9                                                | 0.98 | 319              | 76    | 124   | 122 | 0.0   | 0.462 | 1.76E-11 | -0.394 | 2.98E-13 | -0.031  | 0.40845 |
| 0.9                                                | 0.99 | 212              | 50    | 84    | 79  | 0.0   | 0.451 | 5.15E-08 | -0.401 | 1.10E-09 | 0.020   | 0.58740 |
| 0.95                                               | 0.9  | 339              | 85    | 128   | 129 | 0.0   | 0.426 | 6.93E-12 | -0.382 | 4.55E-12 | -0.026  | 0.43788 |
| 0.95                                               | 0.98 | 278              | 64    | 109   | 108 | 0.0   | 0.455 | 1.95E-09 | -0.389 | 4.81E-10 | -0.026  | 0.46385 |
| 0.95                                               | 0.99 | 183              | 42    | 74    | 69  | 0.0   | 0.439 | 7.63E-06 | -0.397 | 9.90E-08 | 0.023   | 0.47068 |
| 0.97                                               | 0.9  | 292              | 73    | 109   | 112 | 0.0   | 0.435 | 9.41E-10 | -0.379 | 1.46E-09 | -0.028  | 0.43603 |
| 0.97                                               | 0.98 | 241              | 56    | 94    | 94  | 0.0   | 0.464 | 4.89E-08 | -0.381 | 2.41E-08 | -0.027  | 0.49519 |
| 0.97                                               | 0.99 | 160              | 37    | 65    | 60  | 0.0   | 0.439 | 5.01E-05 | -0.396 | 4.42E-06 | 0.011   | 0.37889 |
| 0.98                                               | 0.9  | 239              | 60    | 88    | 92  | 0.0   | 0.445 | 1.32E-08 | -0.380 | 3.76E-08 | -0.036  | 0.31616 |
| 0.98                                               | 0.98 | 197              | 46    | 75    | 77  | 0.0   | 0.478 | 6.62E-07 | -0.384 | 5.78E-07 | -0.034  | 0.31816 |
| 0.98                                               | 0.99 | 129              | 30    | 51    | 49  | 0.0   | 0.443 | 0.00896  | -0.400 | 5.42E-05 | 0.005   | 0.16253 |
| 0.99                                               | 0.9  | 219              | 56    | 81    | 85  | 0.0   | 0.451 | 7.97E-08 | -0.369 | 1.31E-06 | -0.039  | 0.29322 |
| 0.99                                               | 0.98 | 181              | 43    | 69    | 71  | 0.0   | 0.482 | 3.34E-06 | -0.372 | 2.50E-05 | -0.039  | 0.35592 |
| 0.99                                               | 0.99 | 119              | 28    | 47    | 45  | 0.0   | 0.444 | 0.01441  | -0.393 | 0.00015  | -0.007  | 0.19769 |
| Min                                                |      | 119              | 28    | 47    | 45  | 0.0   | 0.426 | 3.83E-14 | -0.401 | 2.4E-16  | -0.039  | 0.16253 |
| Max                                                |      | 394              | 101   | 148   | 148 | 0.0   | 0.482 | 0.01441  | -0.369 | 0.00015  | 0.023   | 0.5874  |
| mean                                               |      | 233              | 56    | 90    | 90  | 0.0   | 0.449 | 0.00156  | -0.387 | 1.6E-05  | -0.018  | 0.37879 |
| <b>null p-value is distributed from 1e-12 to 1</b> |      |                  |       |       |     |       |       |          |        |          |         |         |
| 0.9                                                | 0.9  | 456              | 102   | 149   | 147 | 0.136 | 0.224 | 0.00692  | -0.199 | 0.00098  | -0.0303 | 0.54951 |
| 0.9                                                | 0.95 | 433              | 102   | 149   | 147 | 0.088 | 0.227 | 0.00622  | -0.199 | 0.00099  | -0.0283 | 0.53214 |
| 0.9                                                | 0.97 | 416              | 102   | 149   | 147 | 0.053 | 0.229 | 0.00662  | -0.202 | 0.00078  | -0.0296 | 0.50381 |
| 0.9                                                | 0.98 | 328              | 77    | 125   | 120 | 0.024 | 0.237 | 0.00717  | -0.191 | 0.00580  | -0.0232 | 0.48904 |
| 0.95                                               | 0.9  | 390              | 87    | 129   | 128 | 0.126 | 0.227 | 0.00526  | -0.203 | 0.00183  | -0.0492 | 0.40744 |
| 0.95                                               | 0.95 | 371              | 87    | 129   | 128 | 0.081 | 0.230 | 0.00402  | -0.204 | 0.00208  | -0.0473 | 0.40318 |
| 0.95                                               | 0.97 | 358              | 87    | 129   | 128 | 0.047 | 0.231 | 0.00421  | -0.205 | 0.00202  | -0.048  | 0.39936 |
| 0.95                                               | 0.98 | 284              | 66    | 108   | 105 | 0.021 | 0.236 | 0.00899  | -0.196 | 0.00905  | -0.0409 | 0.44766 |
| 0.97                                               | 0.9  | 339              | 78    | 113   | 112 | 0.115 | 0.227 | 0.00686  | -0.203 | 0.00591  | -0.0606 | 0.38646 |
| 0.97                                               | 0.95 | 324              | 78    | 113   | 112 | 0.074 | 0.230 | 0.00552  | -0.204 | 0.00508  | -0.0586 | 0.40456 |
| 0.97                                               | 0.97 | 314              | 78    | 113   | 112 | 0.045 | 0.230 | 0.00608  | -0.206 | 0.00581  | -0.0597 | 0.39458 |
| 0.97                                               | 0.98 | 250              | 60    | 95    | 93  | 0.02  | 0.231 | 0.02614  | -0.197 | 0.01790  | -0.0571 | 0.41751 |
| 0.98                                               | 0.9  | 280              | 66    | 94    | 92  | 0.107 | 0.217 | 0.02392  | -0.213 | 0.01216  | -0.036  | 0.60610 |
| 0.98                                               | 0.95 | 268              | 66    | 94    | 92  | 0.071 | 0.220 | 0.02001  | -0.213 | 0.01066  | -0.034  | 0.57882 |
| 0.98                                               | 0.97 | 260              | 66    | 94    | 92  | 0.038 | 0.220 | 0.02133  | -0.216 | 0.01075  | -0.0354 | 0.56723 |
| 0.98                                               | 0.98 | 208              | 51    | 78    | 77  | 0.019 | 0.221 | 0.03510  | -0.208 | 0.04489  | -0.0323 | 0.53354 |
| 0.99                                               | 0.9  | 255              | 60    | 86    | 85  | 0.102 | 0.215 | 0.01770  | -0.223 | 0.00903  | -0.0351 | 0.50215 |
| 0.99                                               | 0.95 | 245              | 60    | 86    | 85  | 0.065 | 0.217 | 0.01486  | -0.222 | 0.01003  | -0.033  | 0.49443 |
| 0.99                                               | 0.97 | 238              | 60    | 86    | 85  | 0.038 | 0.216 | 0.01641  | -0.226 | 0.00877  | -0.0348 | 0.49136 |



|      |      |      |     |     |     |     |       |       |         |        |         |         |         |
|------|------|------|-----|-----|-----|-----|-------|-------|---------|--------|---------|---------|---------|
|      | 0.99 | 0.98 | 191 | 47  | 72  | 70  | 0.021 | 0.218 | 0.03019 | -0.218 | 0.03649 | -0.0323 | 0.50339 |
| Min  |      |      | 191 | 47  | 72  | 70  | 0.019 | 0.215 | 0.00402 | -0.226 | 0.00078 | -0.061  | 0.38646 |
| Max  |      |      | 456 | 102 | 149 | 147 | 0.136 | 0.237 | 0.03510 | -0.191 | 0.04489 | -0.023  | 0.60610 |
| mean |      |      | 310 | 74  | 110 | 108 | 0.064 | 0.225 | 0.01367 | -0.207 | 0.01005 | -0.040  | 0.48061 |

<sup>a</sup> Results in the table are averaged over 10 repeat simulations.  $P_c$  is a given criterion for proportion of sum of sample sizes of a SNP over all given causal variables to the largest sum of sample sizes over all SNPs in a simulated dataset and  $P_d$ , given criterion for proportion of sample size of a SNP in a disease to the largest sample size over all SNPs in the disease in a simulated dataset.

Table S8. Results <sup>a</sup> of simulation MVMR analysis of lipid risk for coronary artery disease using dataset SNP185 of Do et al as test data and Mc-lipid-CAD data as mother data

| Pc    | Pd    | Number of SNPs found                               |     |     |    | FDR | LDL-c |          | HDL-c  |         | TG     |         |
|-------|-------|----------------------------------------------------|-----|-----|----|-----|-------|----------|--------|---------|--------|---------|
|       |       | total                                              | LDL | HDL | TG |     | beta  | p-value  | beta   | p-value | beta   | p-value |
|       |       | <b>null p-value is distributed from 1e-07 to 1</b> |     |     |    |     |       |          |        |         |        |         |
|       |       | 238                                                | 82  | 96  | 60 | 0   | 0.391 | 2.98E-15 | -0.129 | 0.01489 | -0.298 | 0.00018 |
| 0     | 0.7   | 223                                                | 77  | 90  | 57 | 0   | 0.391 | 2.42E-14 | -0.126 | 0.02124 | -0.328 | 0.00015 |
| 0     | 0.9   | 155                                                | 53  | 63  | 39 | 0   | 0.392 | 3.75E-08 | -0.113 | 0.09856 | -0.308 | 0.01696 |
| 0     | 0.915 | 143                                                | 49  | 58  | 36 | 0   | 0.385 | 1.52E-07 | -0.114 | 0.09327 | -0.314 | 0.01541 |
| 0     | 0.93  | 128                                                | 45  | 51  | 33 | 0   | 0.365 | 0.001954 | -0.109 | 0.12561 | -0.282 | 0.0999  |
| 0.7   | 0     | 237                                                | 82  | 96  | 60 | 0   | 0.391 | 3.32E-15 | -0.129 | 0.01495 | -0.298 | 0.00018 |
| 0.7   | 0.7   | 222                                                | 77  | 90  | 56 | 0   | 0.391 | 3.00E-14 | -0.125 | 0.02125 | -0.329 | 0.00016 |
| 0.7   | 0.9   | 154                                                | 53  | 63  | 39 | 0   | 0.391 | 5.97E-08 | -0.113 | 0.09825 | -0.308 | 0.01705 |
| 0.7   | 0.915 | 142                                                | 49  | 58  | 36 | 0   | 0.384 | 2.06E-07 | -0.113 | 0.09306 | -0.315 | 0.01553 |
| 0.7   | 0.93  | 128                                                | 45  | 51  | 33 | 0   | 0.365 | 0.001954 | -0.109 | 0.12564 | -0.283 | 0.09989 |
| 0.9   | 0     | 204                                                | 71  | 83  | 52 | 0   | 0.394 | 2.71E-12 | -0.131 | 0.03048 | -0.305 | 0.00136 |
| 0.9   | 0.7   | 191                                                | 66  | 77  | 49 | 0   | 0.393 | 1.04E-10 | -0.126 | 0.04899 | -0.332 | 0.00108 |
| 0.9   | 0.9   | 132                                                | 46  | 54  | 33 | 0   | 0.391 | 2.38E-07 | -0.100 | 0.18609 | -0.294 | 0.09471 |
| 0.9   | 0.915 | 122                                                | 43  | 50  | 30 | 0   | 0.386 | 6.31E-07 | -0.100 | 0.18839 | -0.317 | 0.07237 |
| 0.9   | 0.93  | 109                                                | 39  | 44  | 27 | 0   | 0.366 | 0.003088 | -0.094 | 0.20085 | -0.285 | 0.14139 |
| 0.915 | 0     | 196                                                | 68  | 79  | 50 | 0   | 0.402 | 7.55E-10 | -0.126 | 0.03853 | -0.297 | 0.00314 |
| 0.915 | 0.7   | 183                                                | 64  | 74  | 47 | 0   | 0.402 | 1.40E-09 | -0.121 | 0.05929 | -0.322 | 0.00327 |
| 0.915 | 0.9   | 126                                                | 44  | 51  | 32 | 0   | 0.4   | 2.70E-07 | -0.094 | 0.18848 | -0.28  | 0.11201 |
| 0.915 | 0.915 | 116                                                | 41  | 47  | 29 | 0   | 0.395 | 7.06E-07 | -0.093 | 0.20179 | -0.302 | 0.09169 |
| 0.915 | 0.93  | 104                                                | 37  | 42  | 26 | 0   | 0.374 | 0.006387 | -0.09  | 0.20142 | -0.264 | 0.16553 |
| 0.93  | 0     | 187                                                | 65  | 75  | 47 | 0   | 0.399 | 7.33E-10 | -0.135 | 0.03407 | -0.301 | 0.00282 |
| 0.93  | 0.7   | 175                                                | 62  | 70  | 44 | 0   | 0.4   | 1.97E-09 | -0.130 | 0.05223 | -0.316 | 0.00349 |
| 0.93  | 0.9   | 120                                                | 43  | 49  | 30 | 0   | 0.398 | 4.77E-07 | -0.097 | 0.19502 | -0.281 | 0.13618 |
| 0.93  | 0.915 | 111                                                | 40  | 46  | 27 | 0   | 0.392 | 1.04E-06 | -0.097 | 0.20669 | -0.306 | 0.1214  |
| 0.93  | 0.93  | 99                                                 | 36  | 41  | 24 | 0   | 0.37  | 0.008527 | -0.093 | 0.19999 | -0.264 | 0.19548 |

|      |     |    |    |    |   |       |          |        |          |        |         |
|------|-----|----|----|----|---|-------|----------|--------|----------|--------|---------|
| Min  | 99  | 36 | 41 | 24 | 0 | 0.365 | 3.32E-15 | -0.135 | 0.01495  | -0.332 | 0.00016 |
| Max  | 237 | 82 | 96 | 60 | 0 | 0.402 | 0.00853  | -0.090 | 0.20669  | -0.264 | 0.19548 |
| mean | 151 | 53 | 61 | 38 | 0 | 0.388 | 0.00099  | -0.111 | 0.118379 | -0.299 | 0.06336 |

**null p-value is distributed from 1e-12 to 1**

|       |       |     |    |    |    |       |       |          |         |         |        |         |
|-------|-------|-----|----|----|----|-------|-------|----------|---------|---------|--------|---------|
| 0     | 0     | 352 | 82 | 96 | 61 | 0.324 | 0.384 | 2.79E-14 | -0.1322 | 0.00778 | -0.246 | 0.00170 |
| 0     | 0.7   | 329 | 77 | 90 | 57 | 0.322 | 0.382 | 5.63E-13 | -0.1241 | 0.01499 | -0.266 | 0.01155 |
| 0     | 0.9   | 224 | 53 | 62 | 37 | 0.317 | 0.394 | 7.45E-07 | -0.1287 | 0.09683 | -0.242 | 0.17330 |
| 0     | 0.915 | 206 | 49 | 58 | 34 | 0.316 | 0.401 | 3.55E-06 | -0.1252 | 0.11716 | -0.254 | 0.15864 |
| 0     | 0.93  | 185 | 44 | 53 | 31 | 0.314 | 0.411 | 2.16E-06 | -0.1353 | 0.12906 | -0.264 | 0.14943 |
| 0.7   | 0     | 350 | 82 | 95 | 60 | 0.323 | 0.384 | 2.77E-14 | -0.1299 | 0.01172 | -0.245 | 0.00183 |
| 0.7   | 0.7   | 327 | 76 | 89 | 57 | 0.324 | 0.383 | 5.53E-13 | -0.1218 | 0.02256 | -0.265 | 0.01201 |
| 0.7   | 0.9   | 222 | 53 | 62 | 37 | 0.315 | 0.396 | 6.97E-07 | -0.1245 | 0.12675 | -0.240 | 0.18122 |
| 0.7   | 0.915 | 204 | 49 | 58 | 34 | 0.314 | 0.402 | 3.37E-06 | -0.1208 | 0.14668 | -0.253 | 0.16470 |
| 0.7   | 0.93  | 184 | 44 | 52 | 31 | 0.31  | 0.412 | 2.01E-06 | -0.131  | 0.15974 | -0.261 | 0.14281 |
| 0.9   | 0     | 301 | 70 | 83 | 51 | 0.326 | 0.387 | 3.34E-11 | -0.1372 | 0.02990 | -0.238 | 0.02082 |
| 0.9   | 0.7   | 281 | 65 | 77 | 48 | 0.324 | 0.384 | 1.98E-10 | -0.1285 | 0.04534 | -0.266 | 0.01822 |
| 0.9   | 0.9   | 190 | 45 | 54 | 31 | 0.316 | 0.403 | 2.08E-06 | -0.1254 | 0.14790 | -0.263 | 0.14550 |
| 0.9   | 0.915 | 176 | 41 | 50 | 29 | 0.313 | 0.414 | 2.44E-05 | -0.122  | 0.17048 | -0.263 | 0.13492 |
| 0.9   | 0.93  | 158 | 37 | 45 | 26 | 0.31  | 0.422 | 2.43E-05 | -0.1344 | 0.18013 | -0.256 | 0.14131 |
| 0.915 | 0     | 292 | 68 | 80 | 49 | 0.325 | 0.393 | 1.80E-10 | -0.1325 | 0.03306 | -0.238 | 0.02454 |
| 0.915 | 0.7   | 272 | 64 | 75 | 46 | 0.327 | 0.392 | 5.14E-09 | -0.123  | 0.05150 | -0.265 | 0.02427 |
| 0.915 | 0.9   | 185 | 44 | 52 | 30 | 0.319 | 0.411 | 5.34E-06 | -0.1183 | 0.15294 | -0.257 | 0.19116 |
| 0.915 | 0.915 | 170 | 41 | 48 | 28 | 0.318 | 0.413 | 3.70E-05 | -0.1141 | 0.17602 | -0.257 | 0.17377 |
| 0.915 | 0.93  | 153 | 37 | 44 | 25 | 0.314 | 0.422 | 4.30E-05 | -0.1345 | 0.18612 | -0.248 | 0.17767 |
| 0.93  | 0     | 278 | 64 | 76 | 47 | 0.324 | 0.389 | 4.53E-10 | -0.1319 | 0.03234 | -0.210 | 0.12062 |
| 0.93  | 0.7   | 260 | 60 | 71 | 44 | 0.323 | 0.388 | 5.63E-08 | -0.1234 | 0.04670 | -0.236 | 0.10573 |
| 0.93  | 0.9   | 176 | 41 | 49 | 29 | 0.318 | 0.411 | 2.21E-05 | -0.1228 | 0.14640 | -0.204 | 0.22578 |
| 0.93  | 0.915 | 162 | 38 | 46 | 27 | 0.315 | 0.415 | 3.92E-05 | -0.117  | 0.17288 | -0.198 | 0.27816 |
| 0.93  | 0.93  | 146 | 34 | 42 | 24 | 0.315 | 0.421 | 0.000324 | -0.1374 | 0.17824 | -0.207 | 0.15736 |

|      |     |    |    |    |       |       |          |         |         |        |         |
|------|-----|----|----|----|-------|-------|----------|---------|---------|--------|---------|
| Min  | 146 | 34 | 42 | 24 | 0.31  | 0.383 | 2.77E-14 | -0.1374 | 0.01172 | -0.266 | 0.00183 |
| Max  | 350 | 82 | 95 | 60 | 0.327 | 0.422 | 0.000324 | -0.1141 | 0.18612 | -0.198 | 0.27816 |
| mean | 222 | 52 | 62 | 37 | 0.318 | 0.402 | 2.42E-05 | -0.1268 | 0.11198 | -0.245 | 0.12502 |

<sup>a</sup> Results in table are averaged over 10 repeat simulations.  $P_c$  is a given criterion for proportion of sum of sample sizes of a SNP over all given causal variables to the largest sum of sample sizes over all SNPs in a simulated dataset and  $P_d$ , given criterion for proportion of sample size of a SNP in a disease to the largest sample size over all SNPs in the disease in a simulated dataset.

Table S9. Results <sup>a</sup> of simulation MVMR analysis of lipid risk for coronary artery disease using SNP363 data as test data and Mc-lipid-CAD data as mother data

| P <sub>c</sub>                                     | P <sub>d</sub> | Number of SNPs found |       |       |     | FDR   | LDL-c  |           | HDL-c   |          | TG      |           |
|----------------------------------------------------|----------------|----------------------|-------|-------|-----|-------|--------|-----------|---------|----------|---------|-----------|
|                                                    |                | total                | LDL-c | HDL-c | TG  |       | beta   | pvalue    | beta    | p-value  | beta    | p-value   |
| <b>null p-value is distributed from 1e-12 to 1</b> |                |                      |       |       |     |       |        |           |         |          |         |           |
| 0                                                  | 0              | 612                  | 151   | 239   | 109 | 0.19  | 0.2705 | 2.85E-06  | -0.2144 | 2.50E-03 | -0.0661 | 0.254342  |
| 0                                                  | 0.7            | 601                  | 151   | 239   | 109 | 0.175 | 0.2717 | 2.65E-06  | -0.2167 | 2.74E-03 | -0.0668 | 0.263725  |
| 0                                                  | 0.9            | 566                  | 151   | 239   | 109 | 0.124 | 0.2743 | 9.56E-07  | -0.223  | 2.15E-03 | -0.0679 | 0.267804  |
| 0                                                  | 0.93           | 554                  | 151   | 239   | 109 | 0.105 | 0.2741 | 1.38E-06  | -0.2248 | 2.18E-03 | -0.0708 | 0.273109  |
| 0.5                                                | 0              | 604                  | 151   | 239   | 109 | 0.179 | 0.2706 | 2.55E-06  | -0.2158 | 1.99E-03 | -0.0674 | 0.244669  |
| 0.5                                                | 0.7            | 594                  | 151   | 239   | 109 | 0.165 | 0.2725 | 1.93E-06  | -0.2176 | 2.76E-03 | -0.068  | 0.245366  |
| 0.5                                                | 0.9            | 562                  | 151   | 239   | 109 | 0.117 | 0.2748 | 8.46E-07  | -0.2242 | 2.12E-03 | -0.0694 | 0.262287  |
| 0.5                                                | 0.93           | 551                  | 151   | 239   | 109 | 0.1   | 0.2744 | 1.15E-06  | -0.225  | 2.11E-03 | -0.0716 | 0.264578  |
| 0.7                                                | 0              | 478                  | 145   | 232   | 105 | 0     | 0.2839 | 1.05E-06  | -0.2316 | 1.81E-03 | -0.0750 | 0.252553  |
| 0.7                                                | 0.7            | 478                  | 145   | 232   | 105 | 0     | 0.2839 | 1.05E-06  | -0.2316 | 1.81E-03 | -0.0750 | 0.252553  |
| 0.7                                                | 0.9            | 478                  | 145   | 232   | 105 | 0     | 0.2839 | 1.05E-06  | -0.2316 | 1.81E-03 | -0.0750 | 0.252553  |
| 0.7                                                | 0.93           | 478                  | 145   | 232   | 105 | 0     | 0.2839 | 1.05E-06  | -0.2316 | 1.81E-03 | -0.0750 | 0.252553  |
|                                                    | min            | 478                  | 145   | 232   | 105 | 0     | 0.2705 | 8.46E-07  | -0.2316 | 0.00181  | -0.0750 | 0.244669  |
|                                                    | max            | 612                  | 151   | 239   | 109 | 0.19  | 0.2839 | 2.85E-06  | -0.2144 | 0.00276  | -0.0661 | 0.273109  |
|                                                    | mean           | 546                  | 149   | 237   | 108 | 0.096 | 0.2765 | 1.543E-06 | -0.2240 | 0.00215  | -0.0707 | 0.2571743 |

<sup>a</sup> Results in table are averaged over 10 repeat simulations. P<sub>c</sub> is a given criterion for proportion of sum of sample sizes of a SNP over all given causal variables to the largest sum of sample sizes over all SNPs in a simulated dataset and P<sub>d</sub>, given criterion for proportion of sample size of a SNP in a disease to the largest sample size over all SNPs in the disease in a simulated dataset.

**Supplementary Figures:**

**Figure S1. Scatter error-bar plots of lipoprotein-cholesterols versus coronary artery disease in the data of unique SNPs**

Panels a, b, and c are respectively scatter error-bar plots of genetic associations of SNPs with LDL-c, HDL-c, and TG versus those with risk for CAD based on data of 255 unique SNPs in the data of 338 SNPs from Mc-lipid-CAD data and 247 unique SNPs in the data of 363 SNPs from jointGwasMc-lipid-CAD. Red solid line is a general liner regression line and green dash line is an MR-Egger regression line.

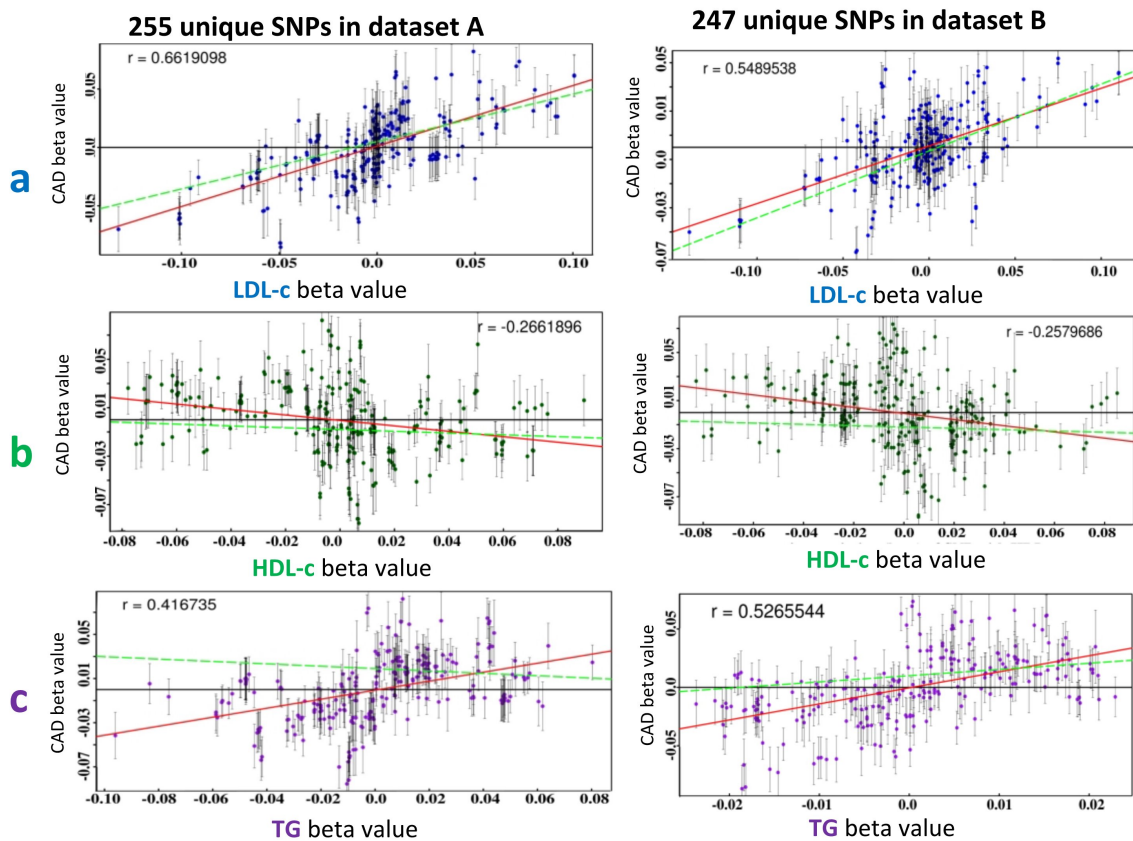

**Figure S2. Scatter error-bar plots of lipoprotein-cholesterols versus coronary artery disease in the data of shared SNPs**

Panels a, b, and c are respectively scatter errorbarplots of genetic associations of SNPs with LDL-c, HDL-c, and TG versus those with risk for CAD based on the data of 83 unique SNPs in the data of 338 SNPs from Mc-lipid-CAD data and 116 shared SNPs in the data of 363 SNPs from jointGwasMc-lipid-CAD. Red solid line is a general liner regression line and green dash line is an MR-Egger regression line.

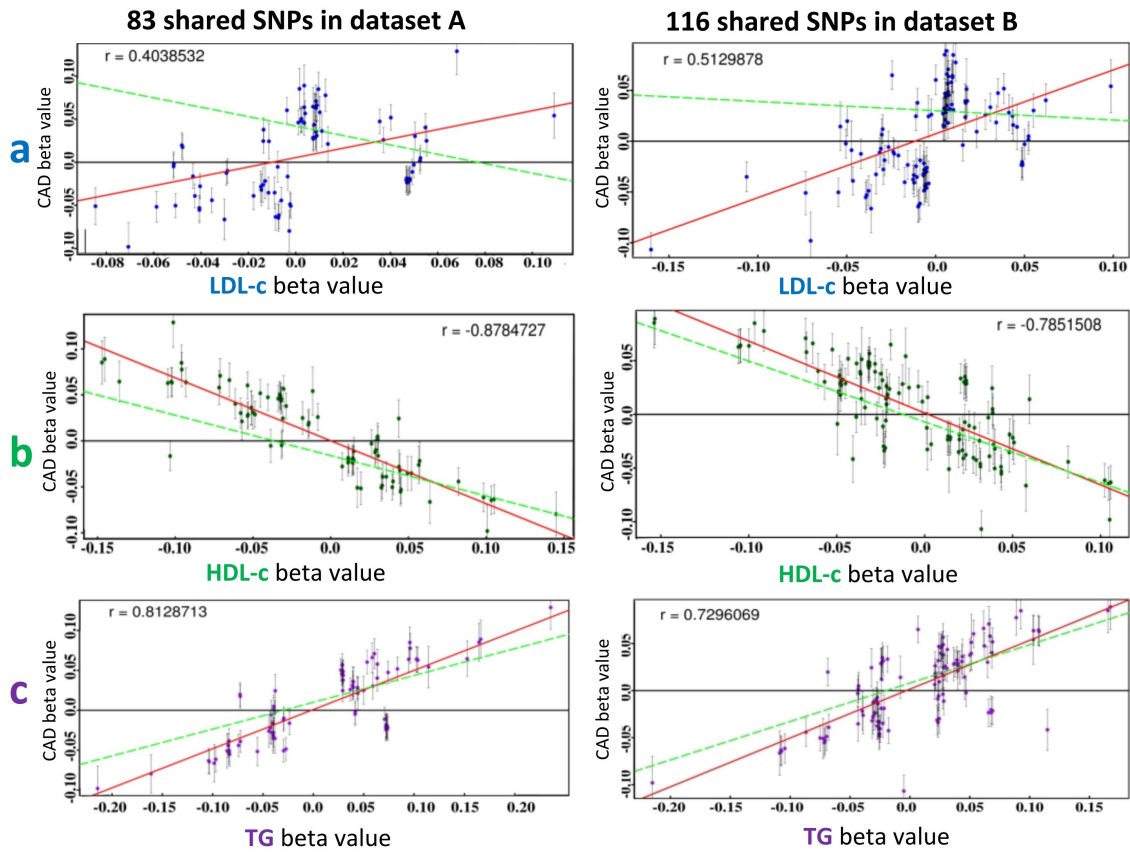

**Supplementary data (in Excel file with tabs for the following):**

1. Dataset A: 338SNPs\_lipid\_CAD
2. Dataset B: 363SNPs\_lipid\_CAD
3. Dataset D1: 173 SNPs\_lipid\_CAD\_Mc
4. Dataset D2: 173SNPs\_lpid\_CAD\_jontGwasMC

**Supplementary R code** for implementing SNP selection, MVMR analysis, drawing forestplot, errorbarplot, and large-scale simulation MVMR analysis will be uploaded on Github.
